# Supplementary material for: The loss of ZnO as the support for metal catalysts by H2reduction
Source: Royal Society of Chemistry journal article supplement (doi:10.1039/c9cp06093f), 2020-01-01
Supplement: c9cp06093f1.pdf [file c9cp06093f1.pdf]

## Supporting Information

### The loss of ZnO as the support for metal catalysts by H<sub>2</sub> reduction

Jingbo Qi<sup>a</sup>, Xun Hu<sup>b,\*</sup>

<sup>a</sup> College of Chemistry Chemical Engineering and Material Science, Zaozhuang University, Zaozhuang, Shandong 277160, China

<sup>b</sup> School of Material Science and Engineering, University of Jinan, Jinan, Shandong 250022, China

\*Corresponding author, e-mail: [xun.hu@outlook.com](mailto:xun.hu@outlook.com) (Xun Hu)

## Figures

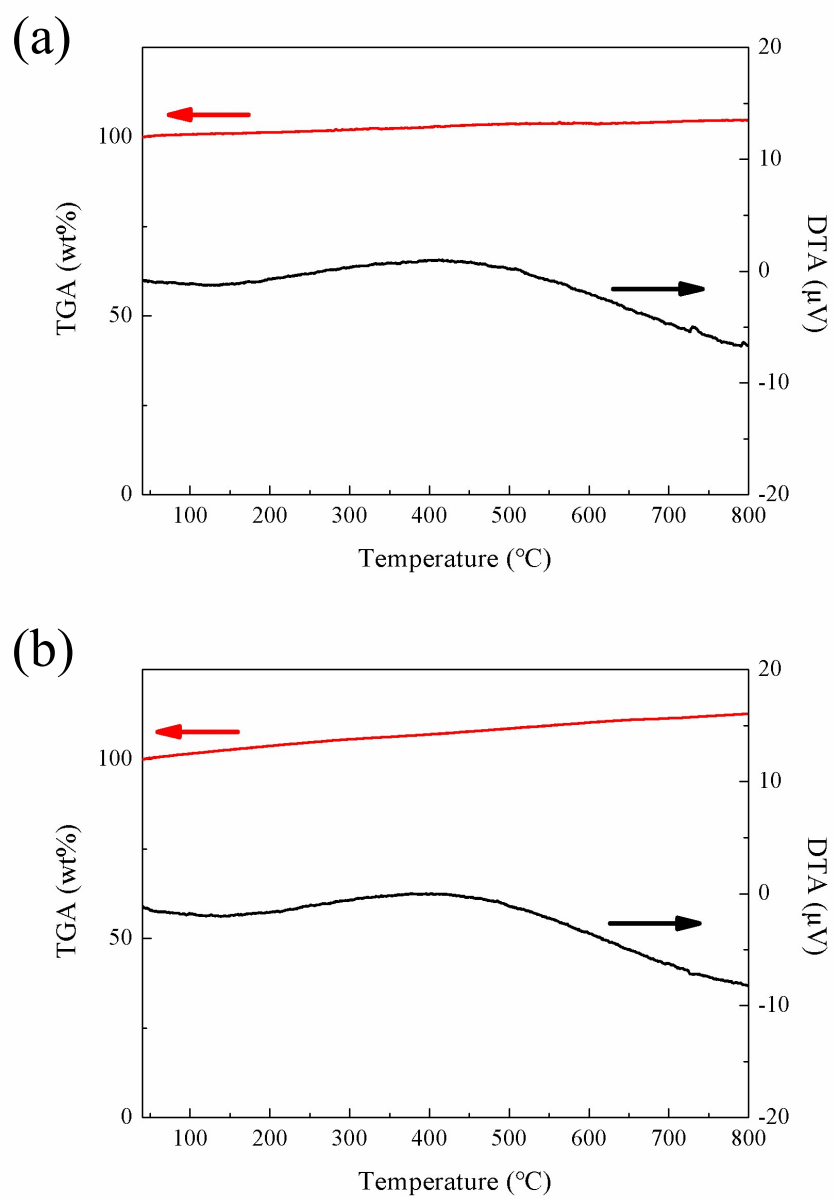

**Fig. S1** TG-DTA profiles of ZnO (a) in air and (b) in  $\text{N}_2$ .

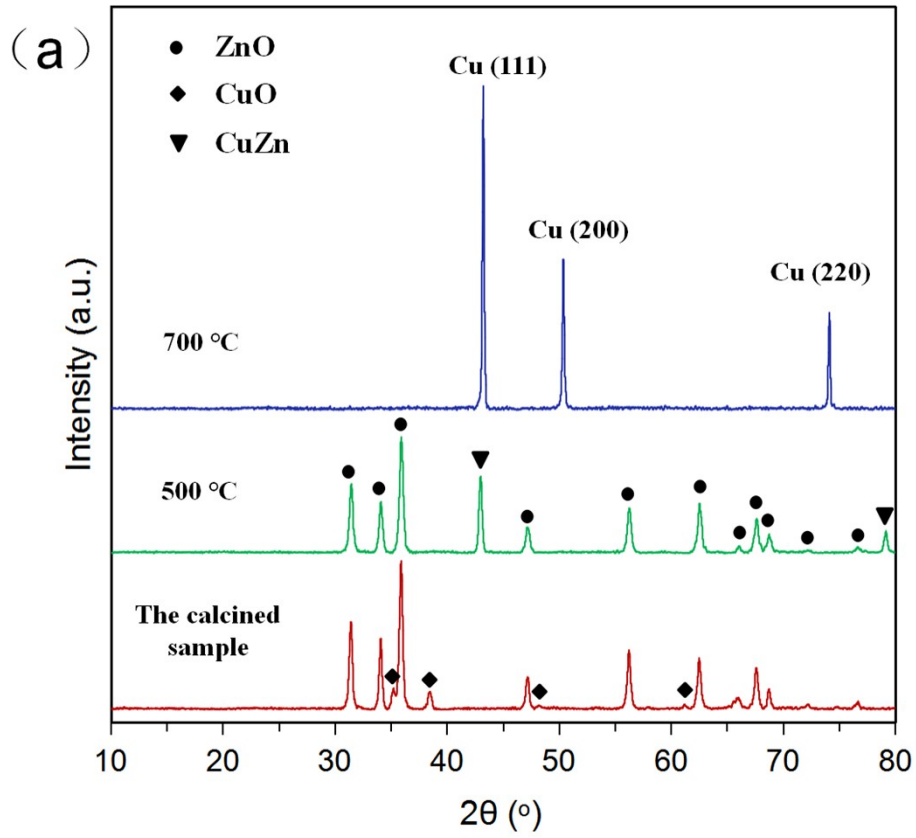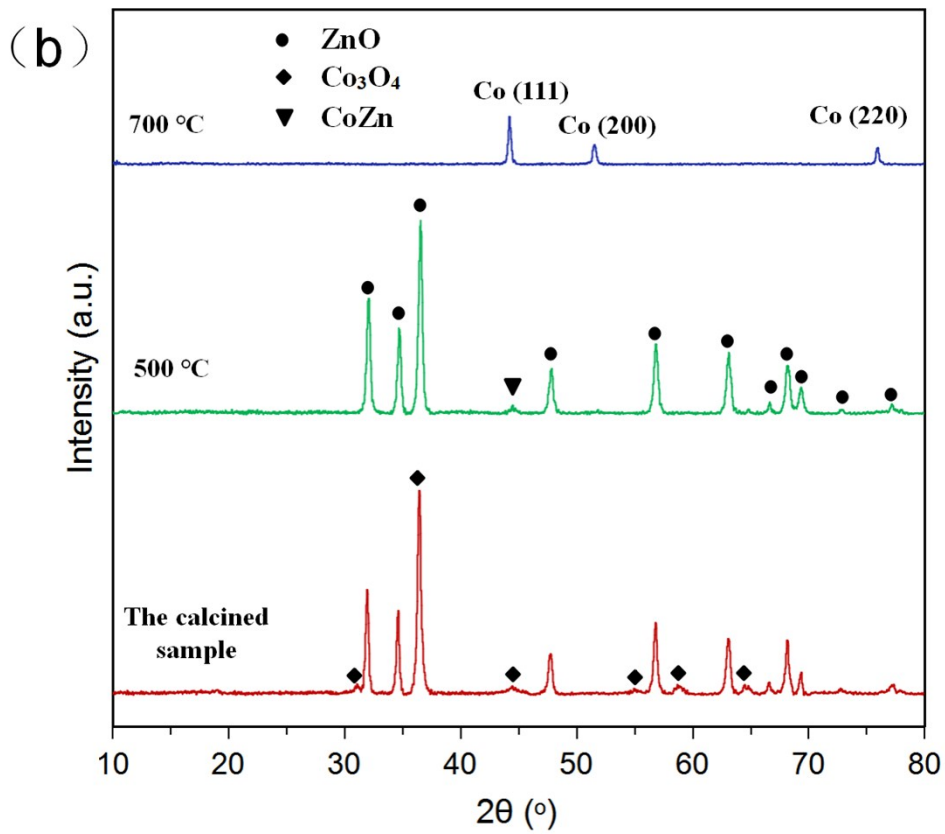

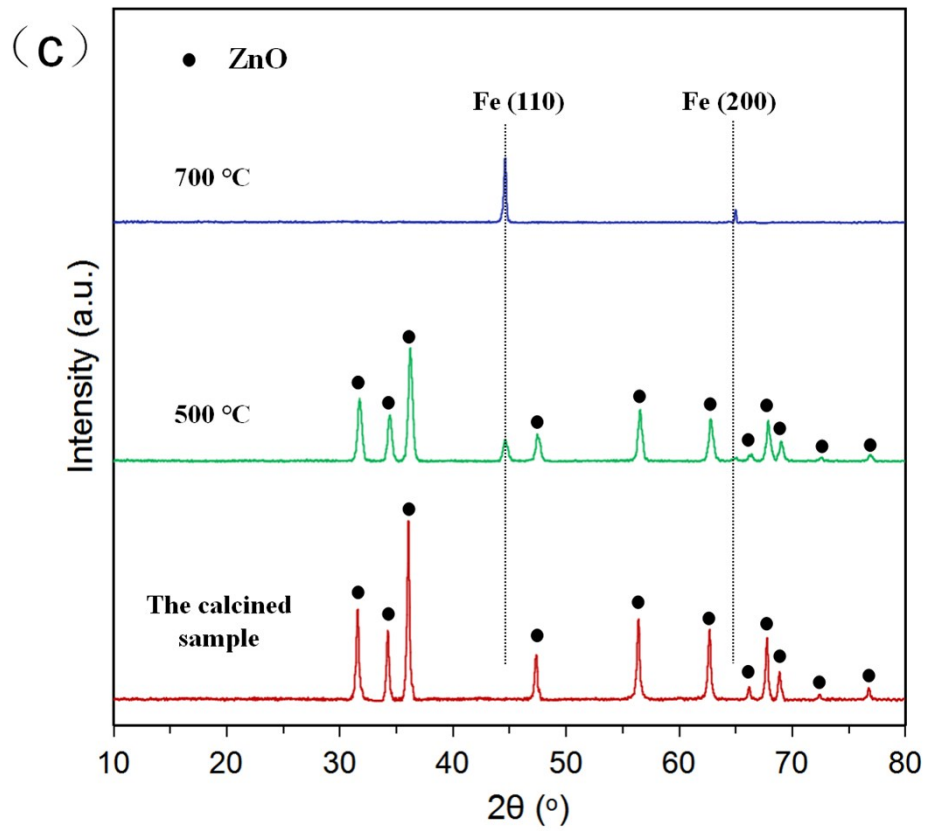

**Fig. S2** XRD patterns of the calcined sample and the reduced samples for (a) Cu/ZnO, (b) Co/ZnO and (c) Fe/ZnO.
